## Methods Article

### **A Minimally Invasive Technique for Serial Intraosseous Perfusion Measurements in the Murine Tibia Using Laser Doppler Flowmetry**

Hanne, Nicholas J<sup>1</sup>; Easter, Elizabeth D<sup>2</sup>; Stangeland-Molo, Sandra<sup>1</sup>; Cole, Jacqueline H<sup>1</sup>

<sup>1</sup> Joint Department of Biomedical Engineering, University of North Carolina, Chapel Hill, NC, and North Carolina State University, Raleigh, NC, USA

<sup>2</sup> Materials Science and Engineering, North Carolina State University, Raleigh, NC, USA

#### **Corresponding Author:**

Jacqueline H. Cole

Joint Department of Biomedical Engineering

University of North Carolina and North Carolina State University

911 Oval Drive

Campus Box 7115

Raleigh, NC 27695-7115

Tel: 919-515-5955

Fax: 919-513-3814

[jacquecole@ncsu.edu](mailto:jacquecole@ncsu.edu)

## Abstract

In biomedical and preclinical research, the current standard method for measuring blood perfusion inside murine bone, radiolabeled microspheres, is a terminal procedure that cannot be used to monitor longitudinal perfusion changes. Laser Doppler flowmetry (LDF) can quantify perfusion within the proximal tibial metaphysis of mice *in vivo* but requires a surgical procedure to place the measurement probe directly onto the bone surface. Sustained inflammation for over a month following this technique was previously reported, and previous studies have used LDF as an endpoint-only procedure. We developed a modified, minimally invasive LDF procedure to measure intraosseous perfusion in the murine tibia without stimulating local or systemic inflammation or inducing gait abnormalities. This modified technique can be used to measure perfusion weekly for up to at least a month.

- Unlike previous endpoint-only techniques, this modified LDF procedure can be performed weekly to monitor serial changes to intraosseous perfusion in the murine tibia
- The modified LDF technique utilizes a smaller, more localized incision to minimize invasiveness and speed recovery

## Keywords

bone blood flow, vascular supply

## 1 **Method Details**

### 2 Background

3 The current standard method for assessing functional blood flow within bone in rodents  
4 uses microspheres labeled with fluorescent or radioactive tags that are introduced to the  
5 vascular supply, and then the amount of microspheres in tissue samples taken from the  
6 animal *ex vivo* are quantified [1,2]. However, this procedure is a terminal one and cannot  
7 be used to assess serial changes to intraosseous blood flow. Laser Doppler flowmetry  
8 (LDF) has been validated as an accurate technique to quantify *in vivo* perfusion within the  
9 murine proximal tibial metaphysis, but signs of local inflammation for over a month after  
10 the procedure were reported [3]. Inflammation stimulates angiogenesis, which could alter  
11 subsequent perfusion measurements [4]. Similarly, inflammation may affect nearby bone  
12 remodeling via cellular signaling [5] or alter limb loading via gait abnormalities [6], both of  
13 which could confound study designs focused on bone tissue outcomes. We have modified  
14 the LDF technique to minimize invasiveness so that it can be used for serial  
15 measurements of bone perfusion at weekly intervals in the same mice without causing  
16 inflammation [7].

17

### 18 Modified LDF Procedure

19 This protocol was approved by the Institutional Animal Care and Use Committee at North  
20 Carolina State University. In this study, the LDF procedure was performed on eighteen  
21 14-week-old male C57Bl/6J mice (The Jackson Laboratory, Bar Harbor, ME). Mice should  
22 be fasted 6-8 hours prior to the procedure. The LDF probe is sensitive to movement,  
23 temperature, and light, so care should be taken to ensure consistent conditions across

24 procedures. The LDF monitor should be regularly calibrated with a probe flux standard.  
25 Follow the manufacturer's directions to calibrate the probe. Calibrate between studies,  
26 not between LDF procedures.

27

### 28 *LDF Monitor and Software Preparation*

- 29 1. Connect the LDF monitor to a computer. Turn on the LDF monitor and open the  
30 data acquisition software provided by the manufacturer. In the signal processing  
31 settings, reduce the bandwidth to one appropriate for the slower blood speeds in  
32 rodent bone, about 0.4-1 mm/s [3], by selecting a lower cutoff frequency for the  
33 low-pass filter (e.g., 3 kHz) [8], as suggested by the manufacturer. *Note: Perfusion*  
34 *data captured with different bandwidth settings should not be compared.*
- 35 2. Clean the LDF probe with 70% ethanol using a sterile cotton swab and allow to air  
36 dry.

37

### 38 *LDF Measurement Procedure*

- 39 1. Anesthetize mouse in an induction chamber with isoflurane (3-5%) in pure oxygen.  
40 *Note: Different gas mixtures (i.e., compressed air) can be used instead of pure*  
41 *oxygen but may alter intraosseous blood supply. Perfusion data should not be*  
42 *compared for different anesthesia conditions.*
- 43 2. Shave the fur over the anterior and medial surfaces of the proximal tibia and knee  
44 joint.
- 45 3. Place the mouse supine on a heated surgical pad, and tape down the hind paws  
46 so that the medial surface of the hindlimb is accessible. Maintain anesthesia with

- 47 isoflurane (1.5-2%). Maintain rectal temperature at 37°C with a feedback-  
48 controlled heating system. Apply ophthalmic ointment to the eyes to prevent  
49 corneal drying during the procedure.
- 50 4. Disinfect the incision site three times with povidone-iodine followed by 70%  
51 ethanol.
- 52 5. Gently palpate the anterior surface of the proximal tibia with forceps to find the  
53 most proximal surface over the anteromedial surface of the bone that does not  
54 have soft tissue beneath the skin. Position the limb (re-tape limb if needed) so that  
55 this site is easily accessible (Figure 1A).

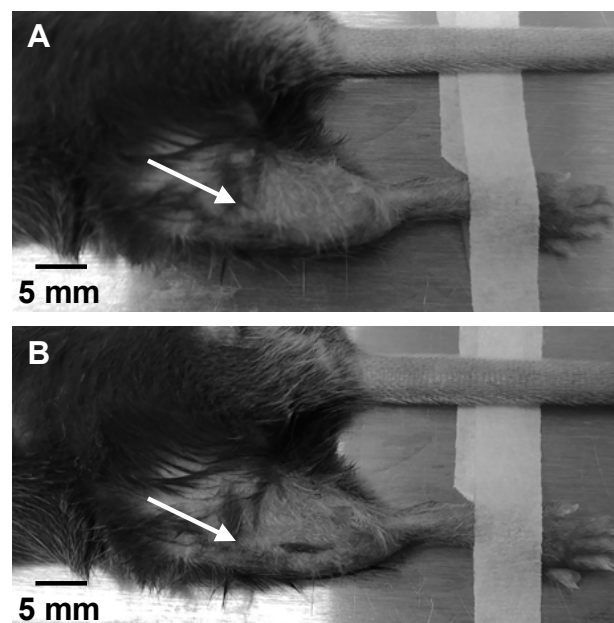

56 **Figure 1:** Image showing the measurement site on the right hindlimb A) before and B) after the  
incision is made. The arrows point to the approximate position of the right knee.

- 57 6. Using a #11 or other preferred small scalpel blade, make a 2-5-mm long sagittal  
58 skin incision directly over the proximal tibia, starting approximately 3-4 mm below  
59 the knee and moving distally (Figure 1B). Use a sterile cotton-tipped applicator to  
60 absorb fluid at the incision site. *Note: This incision should not cause excessive*

61            *bleeding. If blood pools in the incision site, making probe placement difficult, firmly*  
62            *hold a sterile cotton-tipped applicator or gauze for 15-30 seconds until bleeding*  
63            *stops.*

64        7. Using forceps, gently retract any soft tissue covering the tibia and palpate the tibia  
65            to ensure no soft tissue is covering the bone. Using the edge of the scalpel blade,  
66            gently scrape a small window in the periosteum that is approximately the same  
67            size as the LDF probe tip (0.8 mm diameter). Probe the bone surface gently with  
68            the scalpel to confirm the periosteum was removed. Before removal the surface  
69            will feel more compliant when compressed, and after it is removed it will feel  
70            harder.

71        8. Using a micromanipulator, position the LDF probe tip in the periosteum-free  
72            window, placing it firmly against and perpendicular to the exposed bone surface  
73            (Figure 2). Pushing the probe with excessive force into the bone can lower tissue  
74            perfusion measurements, so position it just firmly enough to prevent bone  
75            movement or probe slipping during recording. *Note: The LDF probe is sensitive to*  
76            *motion. Do not touch the LDF probe or fiber optic cable while recording perfusion.*

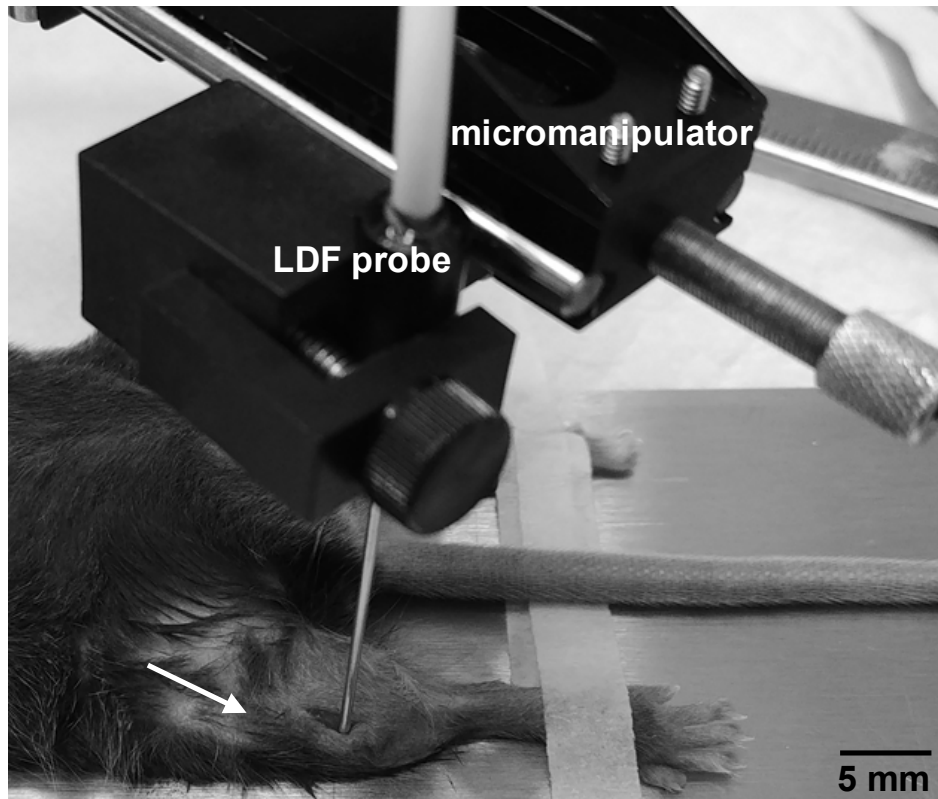

**Figure 2:** Image showing probe placement during the modified laser Doppler flowmetry technique on the right hindlimb. The arrow points to the approximate position of the right knee.

77

78 9. Record perfusion with the LDF monitor's software. We capture 30-second  
79 perfusion readings, which are sufficient for a stable average measurement, but  
80 longer or shorter readings could be recorded, if desired. *Note: Perfusion readings*  
81 *under 5 PU indicate the probe is not placed perpendicular to the medullary cavity,*  
82 *and readings over 30 perfusion units (PU) likely indicate the probe slipped off the*  
83 *bone and is recording in soft tissue. A noisy signal (greater than 5 PU variation)*  
84 *suggests that either the probe is not pressed firmly against the bone, the probe is*  
85 *moving, or the probe is not perpendicular to a flat bone surface. In any of these*  
86 *cases, reposition and secure the probe until resolved. Large spikes in the signal*  
87 *likely indicate limb movement; sufficient anesthesia depth should be confirmed,*

88            *and the hindlimb can be taped down above the knee if additional security is*  
89            *needed.*

90            10. After obtaining a good reading, remove and reposition the LDF probe, and record  
91            again. *Note: We recommend repositioning the probe at least one time to ensure*  
92            *consistent placement over the bone. If the two readings are dissimilar (greater than*  
93            *5 PU difference), then more readings should be taken and averaged.*

94            11. Remove the probe. Pinch the incision closed with forceps, and apply a small  
95            amount of tissue adhesive to the incision. Continue to hold the incision closed for  
96            15 seconds, being careful to avoid contacting the glue with the forceps. *Note:*  
97            *Tissue adhesive should only be applied to the outside of the incision, not within the*  
98            *incision. The glue dries rapidly, and only a small amount is needed to close a small*  
99            *incision.*

100           12. Apply 2% lidocaine cream and triple antibiotic ointment to the incision site.

101           13. Remove the tape from the hindlimbs, remove the rectal probe, and turn off the  
102           isoflurane. Move the mouse to a heated recovery cage until ambulatory. Return to  
103           normal cage and monitor for signs of discomfort twice a day for at least 48 hours  
104           and longer if necessary.

105

## 106    *Data Processing*

107           1. Select individual readings in the LDF monitor software, avoiding spikes if possible.  
108           Export the mean perfusion and length of the reading, which can be either in time  
109           units or number of points.



110 2. Tibial perfusion for each mouse is calculated as the weighted mean of each of the  
111 readings for each mouse:

$$112 \quad T_i = \sum_j^{1..n} t_{i,j}$$
$$113 \quad P_i = \frac{p_{i,j} \cdot t_{i,j}}{T_i}$$

114 where  $T_i$  is the total length of all  $n$  readings for each mouse ( $i$ ),  $t_{i,j}$  is the length of  
115 each reading ( $j$ ) for that mouse,  $P_i$  is the weighted mean perfusion over all readings  
116 for that mouse, and  $p_{i,j}$  is the mean for each perfusion reading for that mouse.

117

## 118 Validation

119 Our modified LDF technique is based on a procedure that has been proven to accurately  
120 measure perfusion in the murine tibia, demonstrated by comparing LDF readings to  
121 controlled blood flow rates through *ex vivo* bone samples using a syringe pump [3].  
122 Greater cortical thickness will have a lower LDF perfusion measurement, but small  
123 variations in cortical thickness do not greatly affect perfusion readings [3]. Therefore, LDF  
124 readings should only be compared when cortical thickness is not expected to be  
125 significantly different, whether with age, sex, mouse strain, treatment, or other conditions.

126

127 We validated that this modified technique can be used serially in the same mice without  
128 inducing inflammation or gait abnormalities [7]. We performed the modified technique in  
129 two groups of male C57Bl/6J mice starting at 12 weeks of age. One group received  
130 weekly tibial perfusion measurements for four weeks ( $n=10$ , *Repeated*), while the other  
131 group only had tibial perfusion measured at the fourth week ( $n=8$ , *Endpoint*). We found

132 no difference in tibial perfusion between the Repeated and Endpoint groups at the end of  
133 the study (t-test  $p = 0.92$ , Figure 3), demonstrating that repeated LDF procedures do not  
134 affect subsequent measurements, at least up to four weeks. We also showed that the  
135 modified technique does not alter hindlimb gait patterns, induce localized inflammation at  
136 the incision site, or cause detectable increases in serum concentrations of inflammatory  
137 marker interleukin-6 when performed weekly in the same mice for four weeks.

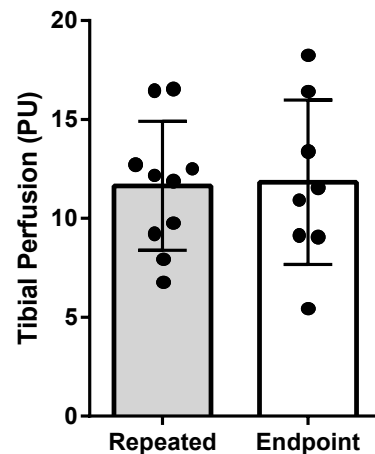

**Figure 3:** Perfusion measured in the proximal tibia was similar between mice that received a weekly laser Doppler flowmetry procedure for four weeks (*Repeated*) and mice that received the procedure only once at the final timepoint (*Endpoint*).

138  
139 While our modified LDF procedure has only been validated for serial bone perfusion  
140 measurements in young adult male C57Bl/6J mice just after skeletal maturity, it may also  
141 be useful in other rodent populations. We have applied this technique to serial  
142 measurements over four weeks in 24-week-old male and female C57Bl/6J mice and to  
143 endpoint measurements in aged male Brown Norway rats at 34 months of age. Other  
144 studies have performed endpoint-only LDF procedures in older mice (17 months of age)  
145 [3], female mice [3], and rabbits [9]. A full validation should be performed before  
146 performing this serial measurement procedure in different populations to ensure the  
147 animals do not respond differently to weekly procedures. Because age, sex, and mouse

148 strain affects LDF perfusion measurements [3], studies involving this technique should be  
149 designed with caution to avoid comparisons across different populations.

## 150 **References**

- 151 [1] M.A. Serrat, Measuring bone blood supply in mice using fluorescent microspheres,  
152 Nat. Protoc. 4 (2009) 1779–58.
- 153 [2] R. E.Tomlinson, M. J.Silva, Skeletal Blood Flow in Bone Repair and Maintenance,  
154 Bone Research. 1 (2013) 311–322.
- 155 [3] B. Roche, A. Vanden-Bossche, M. Normand, L. Malaval, L. Vico, M.-H. Lafage-  
156 Proust, Validated Laser Doppler protocol for measurement of mouse bone blood  
157 perfusion — Response to age or ovariectomy differs with genetic background, Bone.  
158 55 (2013) 418–426.
- 159 [4] C. Costa, J. Incio, R. Soares, Angiogenesis and chronic inflammation: cause or  
160 consequence?, Angiogenesis. 10 (2007) 149–166.
- 161 [5] K. Baek, H.R. Hwang, H.-J. Park, A. Kwon, A.S. Qadir, S.-H. Ko, K.M. Woo, H.-M.  
162 Ryoo, G.-S. Kim, J.-H. Baek, TNF- $\alpha$  Upregulates Sclerostin Expression in Obese  
163 Mice Fed a High-Fat Diet, J. Cell. Physiol. 229 (2014) 640–650.
- 164 [6] D.E. Hurwitz, D.R. Sumner, T.P. Andriacchi, D.A. Sugar, Dynamic knee loads during  
165 gait predict proximal tibial bone distribution, J. Biomech. 31 (1998) 423–430.
- 166 [7] N. J. Hanne, E. D. Easter, J. H. Cole, Validating minimally invasive laser Doppler  
167 flowmetry for serial bone perfusion measurements in mice, [bioRxiv preprint](#). doi:  
168 10.1101/708412.
- 169 [8] I. Fredriksson, C. Fors, J. Johansson, Laser doppler flowmetry - a theoretical  
170 framework, Department of Biomedical Engineering, Linköping University. (2007)  
171 <http://www.imt.liu.se/bit/ldf/ldfmain.html>.

172 [9] M.F. Swiontkowski, S. Tepic, S.M. Perren, R. Moor, R. Ganz, B.A. Rahn, Laser  
173 doppler flowmetry for bone blood flow measurement: Correlation with microsphere  
174 estimates and evaluation of the effect of intracapsular pressure on femoral head  
175 blood flow, J. Orthop. Res. 4 (1986) 362–371.
